# Supplementary material for: Morbimortality Associated with Liver Cirrhosis in Peru: An Ecological Analysis for the Period of 2004–2016
Source: MDPI journal article supplement (doi:10.3390/ijerph19159036), 2022-07-25
Supplement: s1 [file s1]

**Table S1.** ICD-10 codes used in this study.

| ICD Code | ICD-10 Description                                                    |
|----------|-----------------------------------------------------------------------|
| B18      | Chronic viral hepatitis                                               |
| I85      | Esophageal varices                                                    |
| I86.4    | Gastric varices                                                       |
| I98.2    | Oesophageal varices without bleeding in diseases classified elsewhere |
| K70      | Alcoholic liver disease                                               |
| K71.7    | Toxic liver disease with fibrosis and cirrhosis of liver              |
| K72.1    | Chronic hepatic failure                                               |
| K72.9    | Hepatic failure, unspecified                                          |
| K73      | Chronic hepatitis, not elsewhere classified                           |
| K74      | Fibrosis and cirrhosis of liver                                       |
| K75.2    | Nonspecific reactive hepatitis                                        |
| K75.3    | Granulomatous hepatitis, not elsewhere classified                     |
| K75.4    | Autoimmune hepatitis                                                  |
| K75.8    | Other specified inflammatory liver diseases                           |
| K75.9    | Inflammatory liver disease, unspecified                               |
| K76.6    | Portal hypertension                                                   |
| K76.7    | Hepatorenal syndrome                                                  |
| K76.9    | Liver disease, unspecified                                            |
